# Supplementary material for: Vapor-phase π–π molecular recognition: a fast and solvent-free strategy towards the formation of co-crystalline hollow microtube with 1D optical waveguide and up-conversion emission
Source: Royal Society of Chemistry journal article supplement (doi:10.1039/c6tc05048d), 2017-01-01
Supplement: c6tc05048d1.pdf [file c6tc05048d1.pdf]

**Supporting Information for**  
**Vapor-Phase  $\pi$ - $\pi$  Molecular Recognition:**  
**A Fast and Solvent-free Strategy to the Formation of Co-crystalline Hollow**  
**Microtube with 1D Optical Waveguide and Up-conversion Emission**

**Xiaoyu Fang,<sup>a</sup> Xiaogang Yang,<sup>a</sup> and Dongpeng Yan<sup>\*ab</sup>**

[a] Beijing Key Laboratory of Energy Conversion and Storage Materials, College of Chemistry, Beijing Normal University, Beijing 100875, P. R. China, E-mail: yandp@bnu.edu.cn.

[b] State Key Laboratory of Chemical Resource Engineering, Beijing University of Chemical Technology, Beijing 100029, P. R. China.

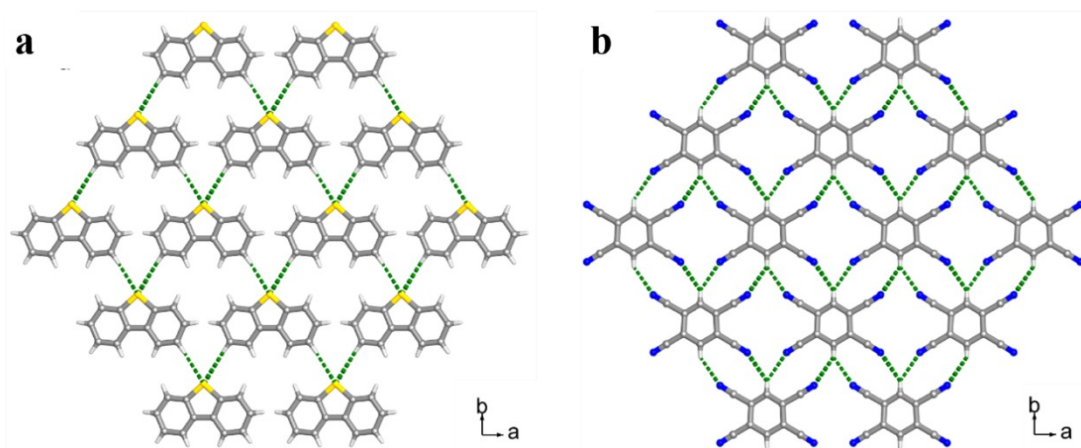

**Figure S1.** The layers of DBT (a) and TCNB (b) in the co-crystal. The green dash represents the hydrogen bond interactions.

**Table S1.** Single crystal structure data for DBT@TCNB.

| Crystal                                            | DBT@TCNB                      |
|----------------------------------------------------|-------------------------------|
| Empirical formula                                  | $C_{22}H_{10}N_4S$            |
| Formula weight                                     | 296(2)                        |
| Temperature / K                                    | 102.2                         |
| Crystal system                                     | monoclinic                    |
| Space group                                        | $C2/m$                        |
| $a / \text{\AA}, b / \text{\AA}, c / \text{\AA}$   | 9.435(6), 12.771(8), 7.237(5) |
| $\alpha / ^\circ, \beta / ^\circ, \gamma / ^\circ$ | 90, 93.021(9), 90             |
| Volume / $\text{\AA}^3$                            | 870.8(10)                     |
| $Z$                                                | 2                             |
| $\rho_{\text{calc}} / \text{mg mm}^{-3}$           | 1.382                         |
| $\mu / \text{mm}^{-1}$                             | 0.200                         |
| $F(000)$                                           | 372.0                         |

|                                                                                   |                                                   |
|-----------------------------------------------------------------------------------|---------------------------------------------------|
| <b>Crystal size / mm<sup>3</sup></b>                                              | 0.290 × 0.270 × 0.250                             |
| <b>2θ range for data collection</b>                                               | 5.374° to 50.998°                                 |
| <b>Index ranges</b>                                                               | -8 ≤ h ≤ 11, -15 ≤ k ≤ 14, -8 ≤ l ≤ 8             |
| <b>Reflections collected</b>                                                      | 2152                                              |
| <b>Independent reflections</b>                                                    | 842[R(int) = 0.0334]                              |
| <b>Data/restraints/parameters</b>                                                 | 842 / 6 / 71                                      |
| <b>Goodness-of-fit on F<sup>2</sup></b>                                           | 1.019                                             |
| <b>Final R indexes [I &gt; 2σ (I) i.e. F<sub>o</sub> &gt; 4σ (F<sub>o</sub>)]</b> | R <sub>1</sub> = 0.0596, wR <sub>2</sub> = 0.1679 |
| <b>Final R indexes [all data]</b>                                                 | R <sub>1</sub> = 0.0659, wR <sub>2</sub> = 0.1756 |
| <b>Largest diff. peak/hole / e Å<sup>-3</sup></b>                                 | 0.27/-0.40                                        |

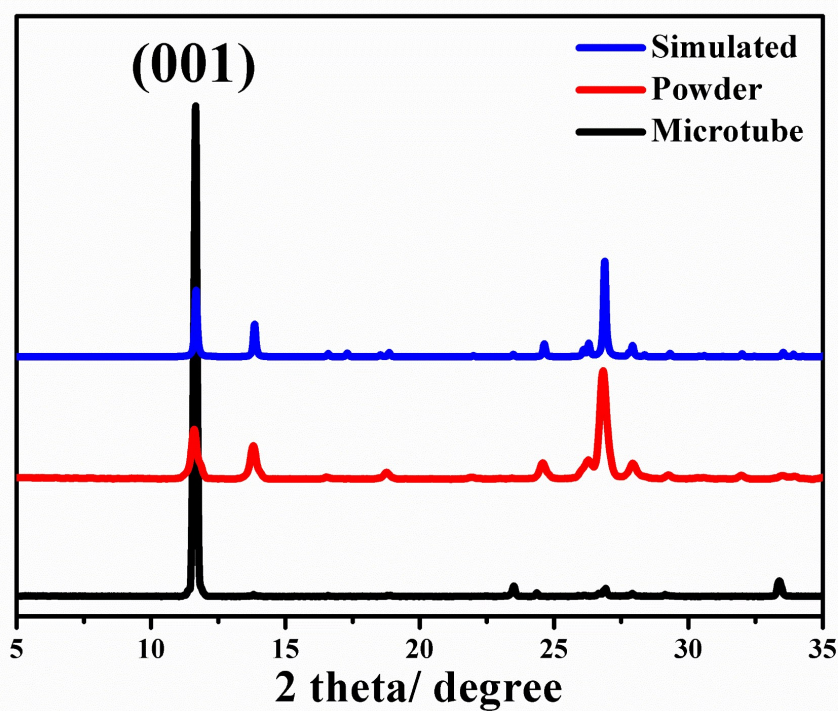

**Figure S2.** The X-ray diffraction (XRD) pattern simulated from the single crystal structure data (top), the XRD pattern of the DBT@TCNB co-crystal powder (middle) and microtube (down).

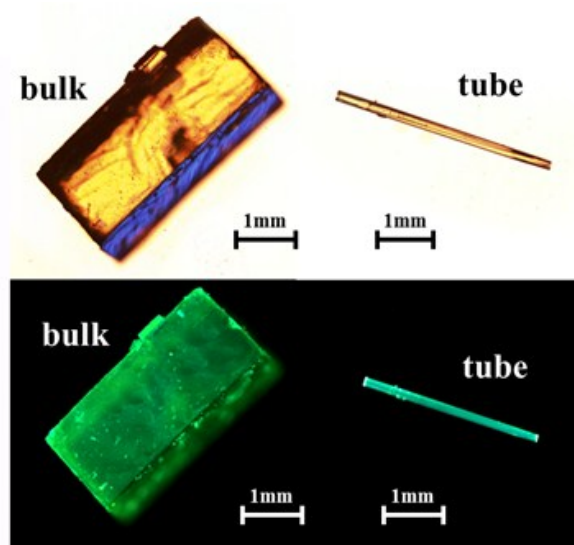

**Figure S3.** Fluorescence microscopy images of co-crystal in bulk (left) and microtube (right) forms under daylight (top) and UV light (down).

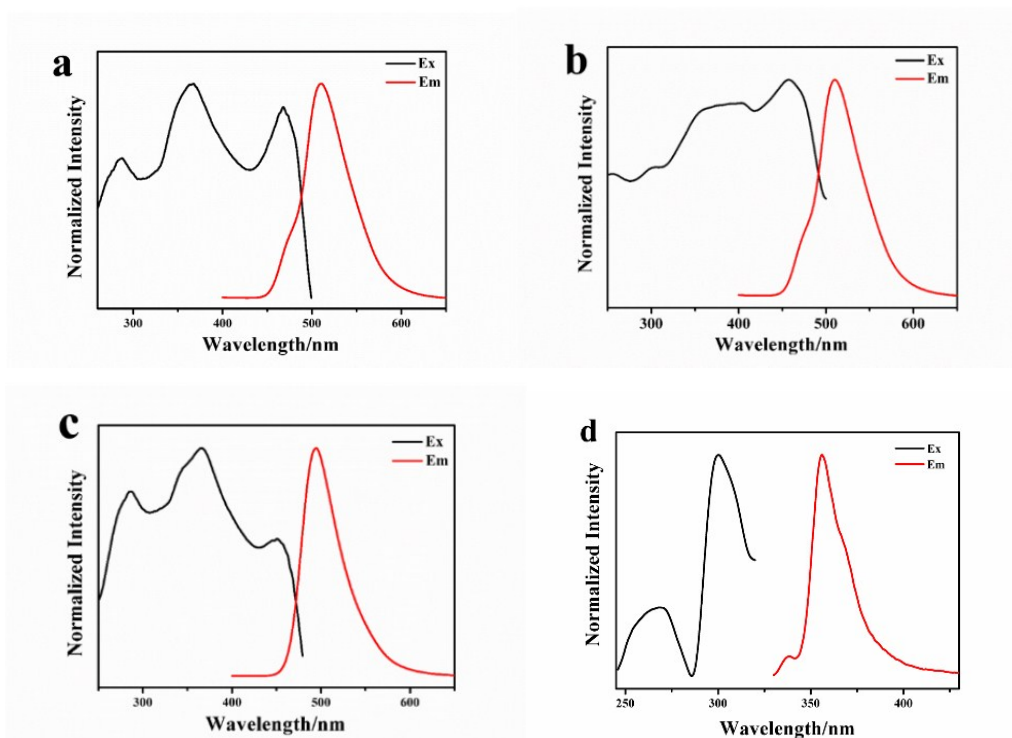

**Figure S4.** Fluorescence (FL) spectra of DBT@TCNB at different states (excitation wavelength: 360 nm) and DBT at room temperature (excitation wavelength: 300 nm). The black line represents the excitation spectra, and the red line represents the emission spectra: (a) in the state of bulk; (b) in the state of microtube; (c) in the state of powder, as obtained by grinding the microtube. (d) FL spectra of DBT.

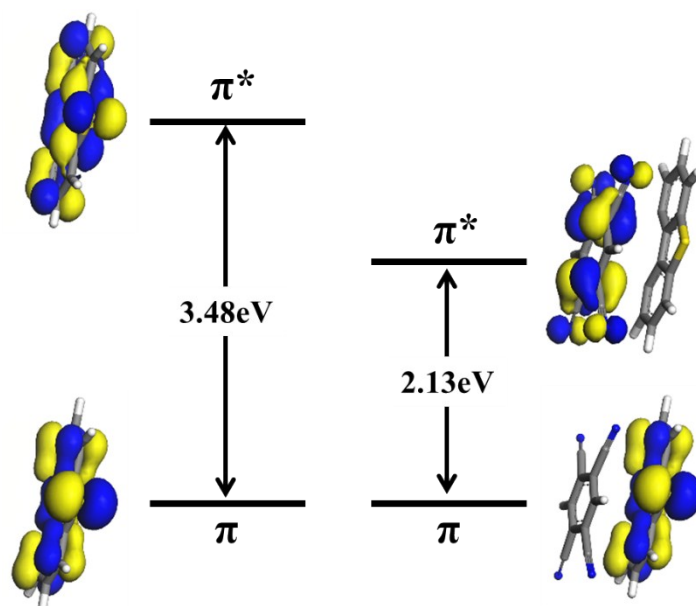

**Figure S5.** Calculated molecular orbital diagrams for the pristine DBT (left) and DBT@TCNB co-crystal (right).

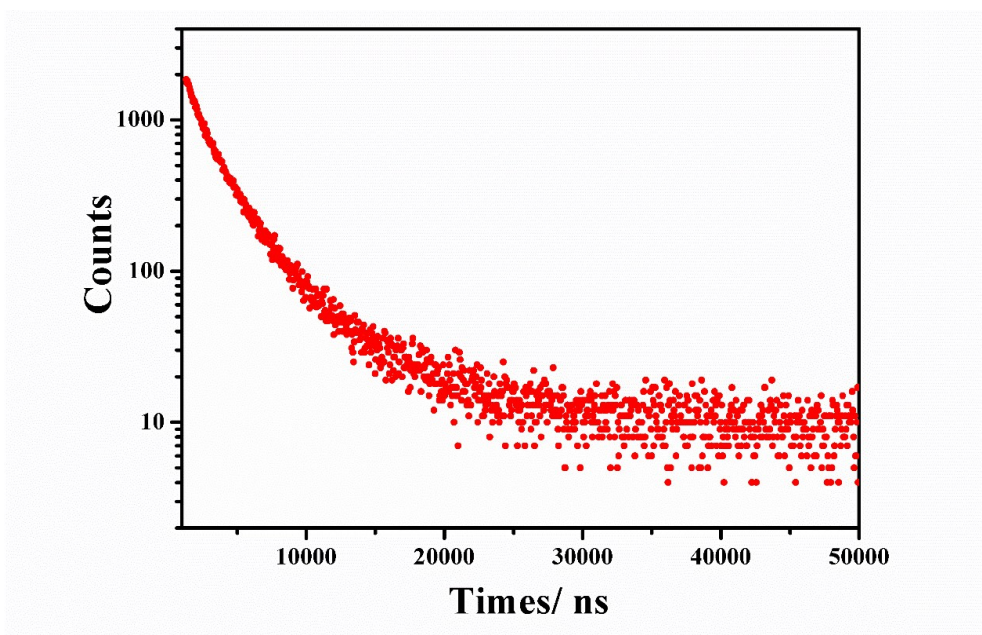

**Figure S6.** Fluorescence decay curve of the co-crystal microtube.

**Table S2.** Fluorescence decay of the co-crystal microtube

| m | $\tau_i$ (ns) | $A_i$      | $\langle\tau\rangle$ (ns) | $\chi^2$ |
|---|---------------|------------|---------------------------|----------|
| 1 | 2118.3        | 3177.44698 | 2118.3                    | 1.35     |
| 2 | 3471.3        | 1193.02266 | 2328.0                    | 1.09     |
|   | 1082.3        | 3511.82215 |                           |          |

m stands for the mono- or double-exponential fitting of the fluorescence decay curve;  $\tau_i$  is the fluorescence lifetime, for  $m = 1$ , lifetime is  $\tau_1$ , and for  $m = 2$ , two lifetimes are  $\tau_1$  and  $\tau_2$ ;  $A_i$  stands for the fractional weights. The fitting goodness is indicated by the value of  $\chi^2$ . In the double-exponential case,  $\langle\tau\rangle = (\tau_2 \cdot 1 \cdot A_1 + \tau_2 \cdot 2 \cdot A_2) / (\tau_1 \cdot A_1 + \tau_2 \cdot A_2)$ .

**Table S3.** Surface area percentage of important facets of co-crystal by BFDH method

| <i>hkl</i> | Multiplicity | $d_{hkl}$ | Distance | Total facet area% |
|------------|--------------|-----------|----------|-------------------|
| {1 1 0}    | 4            | 7.57      | 13.21    | 52.13             |
| {0 0 1}    | 2            | 7.22      | 13.85    | 31.32             |
| {0 2 0}    | 2            | 6.39      | 15.66    | 13.51             |
| {1 1 -1}   | 4            | 5.34      | 18.74    | 3.04              |

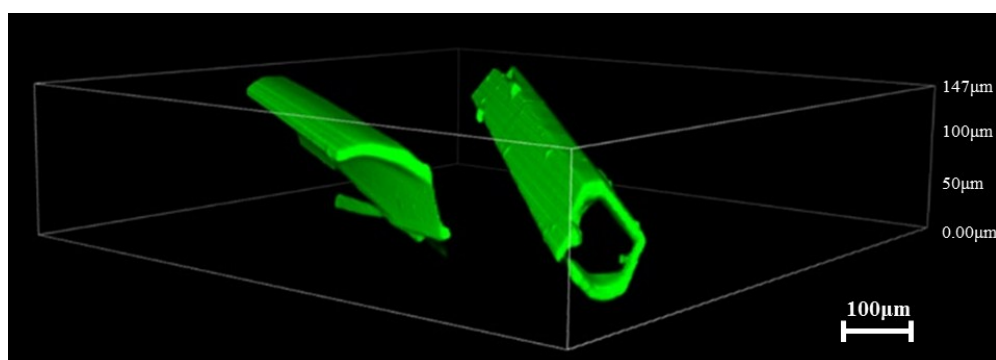

**Figure S7.** Image of the reconstructed 3D structures of unclosed co-crystalline microtube based on the fluorescence signal using a laser confocal microscope.
